# Supplementary material for: Plumbagin alleviates temporomandibular joint osteoarthritis progression by inhibiting chondrocyte ferroptosis via the MAPK signaling pathways
Source: publisher site journal article supplement (doi:10.18632/aging.205253), 2023-11-29
Supplement: Supplementary file [file aging-v15i22-205253-supplementary-material-SD2.pdf]

## SUPPLEMENTARY TABLE

**Supplementary Table 1. Primer sequences.**

| <b>Genes</b>   | <b>Forward (5'-3')</b>    | <b>Reverse (5'-3')</b>  |
|----------------|---------------------------|-------------------------|
| Col2a1         | GTGTCAAGGGTCACAGAGGTTAC   | CGCTCTCACCCCTTCACACCT   |
| ACAN           | AGTGACCCATCTGCTTACCCTG    | CTGCATCTATGTCGGAGGTAGTG |
| MMP-13         | ATGTGACACCTCTGAATTTTACCAG | CATGGGCAGCAACAATAAATAAG |
| Adamts-5       | CCTGAAGGAGCAACCCACAT      | GCTTTGGGTAGGCCTTGTCT    |
| GPX-4          | AAAGTCCTAGGAAGCGCCCA      | GTGGGCATCGTCCCCATTTA    |
| SLC7A11        | AGGCGGTAGCATAAATAGGAGC    | GTGACAGTACTCCACAGGCA    |
| ACSL4          | CCTCCGGGCTCGTCTTTTC       | GCTGTGAATCTCAAGCCCCT    |
| PTGS2          | AGGGCCCTACCAAGATGCTA      | AATTTCTCTGAGGCACGGCA    |
| $\beta$ -actin | CACCCGCGAGTACAACCTTC      | GTACATGGCTGGGGTGTGA     |
